# Supplementary material for: Electrostatically induced reconstruction of the 3D nitrogen-doped Ti3C2Tx electrode and its excellent desalination performance for hybrid capacitive deionization
Source: Royal Society of Chemistry journal article supplement (doi:10.1039/d3nj05188a), 2023-12-28
Supplement: d3nj05188a1.pdf [file d3nj05188a1.pdf]

## **Electrostatically induced reconstruction of 3D nitrogen-doped $\text{Ti}_3\text{C}_2\text{T}_x$ electrode and its excellent desalination performance for hybrid capacitive deionization**

Jiao Wu<sup>a, b</sup>, Bingbing Chen<sup>a</sup>, Aihu Feng<sup>a</sup>, Kun Liu<sup>a, \*</sup>, Yun Yu<sup>a, b, \*</sup>

<sup>a</sup> *Key Laboratory of Inorganic Coating Materials CAS, Shanghai Institute of Ceramics, Chinese Academy of Sciences (SICCAS), Shanghai 200050, PR China*

<sup>b</sup> *University of Chinese Academy of Sciences (CAS), Beijing 100049, PR China*

\* Corresponding authors.

*E-mail addresses:* liukun@mail.sic.ac.cn (K. Liu), yunyush@mail.sic.ac.cn (Y. Yu).

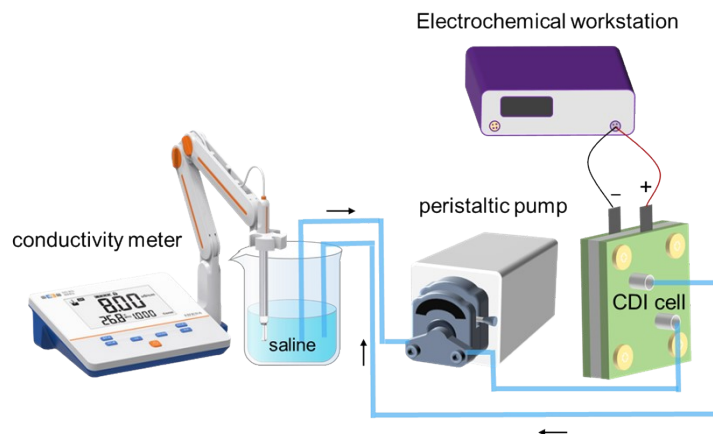

**Fig. S1** The schematic diagram of the CDI setup.

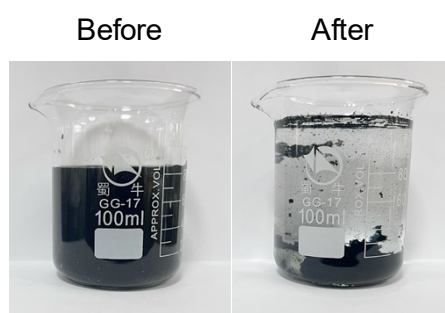

**Fig. S2**  $d\text{-Ti}_3\text{C}_2\text{T}_x$  solution (a) before and (b) after adding electropositive melamine solution.

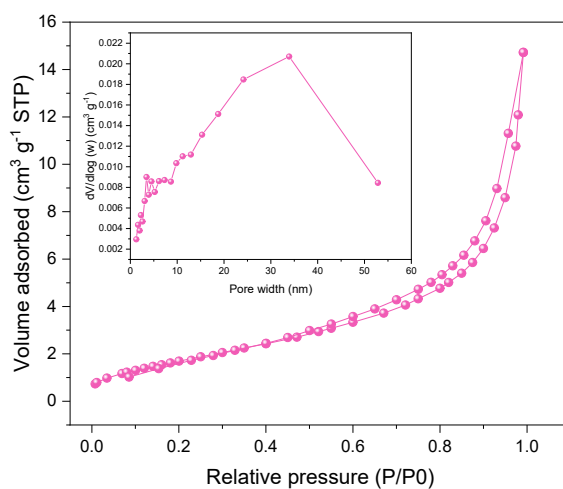

**Fig. S3**  $\text{N}_2$  adsorption and desorption isotherms along with pore size distribution of

m-Ti<sub>3</sub>C<sub>2</sub>T<sub>x</sub>.

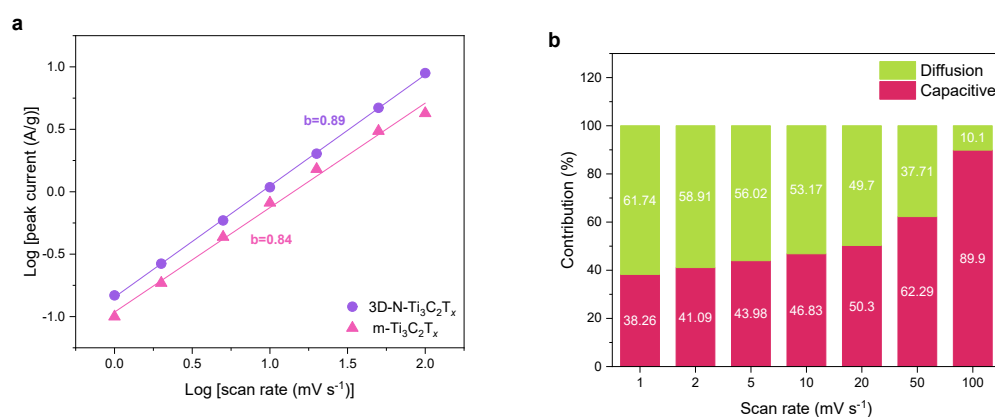

**Fig. S4** (a) The plot of Log (scan rate) against Log (peak current) of m-Ti<sub>3</sub>C<sub>2</sub>T<sub>x</sub> and 3D-N-Ti<sub>3</sub>C<sub>2</sub>T<sub>x</sub>, and (b) diffusion- and capacitive- contribution of m-Ti<sub>3</sub>C<sub>2</sub>T<sub>x</sub>.

**Table S1** The chemical composition of samples evaluated by XPS quantitative analysis.

| Atom (%)                                           | Ti    | C     | O     | F     | N    |
|----------------------------------------------------|-------|-------|-------|-------|------|
| m-Ti <sub>3</sub> C <sub>2</sub> T <sub>x</sub>    | 28.77 | 29.75 | 24.05 | 17.42 | 0    |
| 3D-N-Ti <sub>3</sub> C <sub>2</sub> T <sub>x</sub> | 31.58 | 31.32 | 22.66 | 10.64 | 3.79 |
